# Supplementary material for: An integrative study of five biological clocks in somatic and mental health
Source: eLife. 2021 Feb 9;10:e59479. doi: 10.7554/eLife.59479 (PMC7872513; doi:10.7554/eLife.59479)
Supplement: Source data 2. [file elife-59479-data2.xls]

## Sheet: betas_selected
	Telomere length	Epigenetic clock	Transcriptomic clock	Proteomic clock	Metabolomic clock	Composite index
Data used for Figure 4	Beta:
Sex (male/female)	-0.0868784804445797	-0.106313047519753	-0.133514466858488	-0.024265683905315	-0.0956640172331382	-0.182148205343406
Education (# years)	-0.0452942683363742	0.0230184589999946	0.00634794486464882	-0.0382764190884982	-0.0397551466909106	-0.0393011518089153
Alcohol use (units per week)	0.0140117538949828	-0.0344304324179734	0.0643650289400115	0.0782839728737273	0.0574603854980329	0.073134675331345
Smoking (pack years)	0.0288792275410775	-0.00590517217664597	0.0639731072166585	0.11826574000567	0.0461841287070442	0.0982843219385799
Physical activity	-0.0251256413675163	-0.0873463977521205	-0.017960452598978	0.0275641536458056	0.0126529647956654	-0.0361811649705717
BMI	0.0615280594341285	0.0916848651668316	0.132864260113242	0.123771016432105	0.185966638634505	0.239965715470879
Physical disability	0.0334072998585457	0.124248759716044	0.0972880581677506	-0.00290242015779165	0.00587800838059723	0.104182740362351
Lung capacity	0.0364477532163861	0.0454964380402893	0.0458578517216668	-0.0323458220712157	-0.0270776622966622	0.0309351288572322
Hand grip strength	-0.098746210271312	-0.0458988609683747	0.0195353167705292	0.0112140299150606	0.0379564193613308	-0.0279081144779458
Cardiometabolic disease (no/yes)	0.043021213437939	0.0455071285595981	0.0444885823861086	0.0128486622807891	0.104232415656671	0.0970601432130986
Respiratory disease (no/yes)	-0.0475788392053493	-0.0424264184201853	-0.00934696594251276	0.0125069330982879	0.0224060714382821	-0.0277740021586565
Musculoskeletal disease (no/yes)	-0.0219446520300158	0.0150219967963861	0.0758341722879163	0.048176827347749	0.102646836066641	0.0873804383264385
Digestive disease (no/yes)	0.0111953216251996	0.0148340559713105	0.0508127676796934	0.0805954530258357	-0.0374451114313067	0.0490083850330116
Neurological disease (no/yes)	-0.082592660056465	0.00347375791169118	0.0215798548886904	-0.0346184567684142	-0.00728998098653503	-0.0426965566533455
Endocrine disease (no/yes)	0.0130403674755147	-0.0277602235862317	0.0181897584496367	0.087775834654281	0.0566644421176258	0.0598793981133525
Cancer (no/yes)	-0.0163510884810758	0.0861887619255535	0.0341997835277131	0.0480486858927812	0.0510647372136041	0.0816549569053985
Metabolic syndrome (# components)	0.112300631092273	0.0619271229176836	0.156930601186736	0.136443477558143	0.231250479653828	0.27694413241104
# Chronic diseases	-0.0586897655003936	0.0606644102219477	0.0679033634864453	0.0477629144005573	0.0339453836836576	0.0593819013428528
Current MDD (no/yes)	0.0431423585777262	0.0987808831427657	0.090970976358098	0.0456890584919751	-0.0177222881268457	0.106319516305958
Depression severity	0.0597145020994264	0.135055029264949	0.105240575553251	0.0307657834927552	-0.00214452575926676	0.133227227626188
Childhood Trauma (# events)	-0.0582698596335882	0.157639644988036	0.0513078282400047	0.0455773572120248	0.031938774427931	0.0902742950077519
	SD:
Sex (male/female)	0.0365340202229632	0.0390780191551392	0.0389906846693887	0.0378040020312383	0.0387708058245055	0.0382250488318829
Education (# years)	0.036875666123219	0.0396595404644786	0.0395897660365424	0.0383665646491693	0.0393477554820023	0.0387938770613291
Alcohol use (units per week)	0.0370938056964006	0.0398280134242267	0.0396925835431078	0.0384482851087861	0.0394940145310061	0.0388956968175903
Smoking (pack years)	0.0396548962035432	0.0400504868283454	0.039774097152616	0.0382757713652061	0.0394560448724866	0.0387878699158884
Physical activity	0.0374822748467166	0.0404211018723944	0.0403920290985597	0.0387741394849398	0.0398487216900798	0.0396495576330772
BMI	0.0376374390182724	0.03905689615858	0.0387822022068194	0.0376942126299719	0.0382764425849097	0.0372535769923694
Physical disability	0.0371702465622827	0.0393232689899377	0.0395658476835112	0.038577836616872	0.0395471157844938	0.0387653686763494
Lung capacity	0.0484347828283171	0.0506676513802478	0.0506625161042939	0.0491155902466368	0.0503448474111214	0.0497030644467404
Hand grip strength	0.0542782070743223	0.0565460688533414	0.0582260185899659	0.0547565424412703	0.0561399633534326	0.0553586362131761
Cardiometabolic disease (no/yes)	0.0398223163840117	0.0402895214701457	0.0402242025864839	0.0390310685819261	0.0398227970118331	0.0392848676383612
Respiratory disease (no/yes)	0.0365206742480006	0.0392237966862008	0.0391883471104732	0.0379955264550739	0.0389612923747326	0.0384073069392194
Musculoskeletal disease (no/yes)	0.0374215888344075	0.0392397045881184	0.0390669775880907	0.0379367306723008	0.0387463260044547	0.0382538517423257
Digestive disease (no/yes)	0.0364187226054419	0.0391556247439178	0.0390459452820302	0.0377696990667883	0.0388447397057289	0.0382771039899149
Neurological disease (no/yes)	0.0361766548370621	0.0390441511265648	0.0389708097571251	0.0377661508215271	0.0387568704906872	0.0381755760829997
Endocrine disease (no/yes)	0.0367593640475965	0.0391716550368788	0.0390943991013832	0.0377117578154875	0.0387889297195038	0.0382730524832081
Cancer (no/yes)	0.0363291203802175	0.0388505939190362	0.0389096346241581	0.0376987298160487	0.038660015179584	0.0380319656388634
Metabolic syndrome (# components)	0.0399380197495579	0.0401280709443622	0.0394481462171651	0.0386617262138992	0.0384580000913548	0.0379780399083917
# Chronic diseases	0.0387192009723418	0.039646024646558	0.0395696796142494	0.0383965384051821	0.0394037794755784	0.0388013110266543
Current MDD (no/yes)	0.0368998190285274	0.0394827708475766	0.0394496044448543	0.0383576039040656	0.0393763444090433	0.0386023296084015
Depression severity	0.0379644693165454	0.040254280558096	0.0407048160721713	0.040081213655411	0.0404973005514781	0.0393696948074966
Childhood Trauma (# events)	0.0370977030250592	0.039070900220672	0.0394554020637765	0.0381222718621132	0.0391956627402286	0.0385671225578823
