# Supplementary material for: An integrative study of five biological clocks in somatic and mental health
Source: eLife. 2021 Feb 9;10:e59479. doi: 10.7554/eLife.59479 (PMC7872513; doi:10.7554/eLife.59479)
Supplement: Supplementary file 1. [file elife-59479-supp1.xls]

## Sheet: mdd_interaction_others
	Telomere Length			Epigenetic Aging			Transcriptomic Aging			Proteomic Aging			Metabolomic Aging
	Beta	SD	P	Beta	SD	P	Beta	SD	P	Beta	SD	P	Beta	SD	P
Metabolic medication (no/yes)	0.049012	0.0501995	0.328974	0.139228	0.0822696	0.0908591	0.0746989	0.060609	0.217918	0.0973917	0.0618962	0.115783	0.153471	0.0504037	0.0023489
Antidepressants (no/yes)	0.0827084	0.0399946	0.0387288	0.106277	0.0644814	0.099594	0.129141	0.0487193	0.00809612	0.208388	0.0523573	7.15748e-05	0.0859096	0.0427592	0.0446136
In bold the P-values significant at FDR 5%
