# Supplementary material for: An integrative study of five biological clocks in somatic and mental health
Source: eLife. 2021 Feb 9;10:e59479. doi: 10.7554/eLife.59479 (PMC7872513; doi:10.7554/eLife.59479)
Supplement: Supplementary file 2. — For each biological aging indicator linear models were fit with the health determinant as predictor, while controlling for sex. The analysis was limited to the 653 samples with all five data layers available. Beta’s and p-values from these models are presented here. * Beta for telomere length was multiplied by −1 to compare with other biological aging indicators. All measures are coded such that higher values indicate advanced biological aging. Bold indicates FDR < 5%. [file elife-59479-supp2.xls]

## Sheet: combined-selected_scaled_ordere
		Telomere Length	N=653	Epigenetic Aging	N=653	Transcriptomic Aging	N=653	Proteomic Aging	N=653	Metabolomic Aging	N=653	Composite Index	N=653
		Beta*	P	Beta	P	Beta	P	Beta	P	Beta	P	Beta	P
Demographic	Sex (male/female)	-0.0868785	0.0176964	-0.106313	0.0066931	-0.133514	0.000655462	-0.0242657	0.521178	-0.095664	0.0138671	-0.182148	2.33266e-06
	Education (# years)	-0.0452943	0.219784	0.0230185	0.561846	0.00634794	0.872661	-0.0382764	0.318822	-0.0397551	0.312704	-0.0393012	0.311403
Lifestyle	Alcohol use (units per week)	0.0140118	0.705749	-0.0344304	0.387646	0.064365	0.105379	0.078284	0.0421493	0.0574604	0.146179	0.0731347	0.0605201
	Smoking (pack years)	0.0288792	0.466722	-0.00590517	0.882829	0.0639731	0.108244	0.118266	0.00209051	0.0461841	0.242232	0.0982843	0.0115204
	Physical activity	-0.0251256	0.502899	-0.0873464	0.0310901	-0.0179605	0.656728	0.0275642	0.477424	0.012653	0.750954	-0.0361812	0.361853
Somatic Health	BMI	0.0615281	0.102588	0.0916849	0.0192028	0.132864	0.000651583	0.123771	0.00108046	0.185967	1.48635e-06	0.239966	2.31504e-10
	Physical disability	0.0334073	0.369115	0.124249	0.00165344	0.0972881	0.0141987	-0.00290242	0.940051	0.00587801	0.88189	0.104183	0.00738442
	Lung capacity	0.0364478	0.452019	0.0454964	0.369554	0.0458579	0.365718	-0.0323458	0.510411	-0.0270777	0.590871	0.0309351	0.5339
	Hand grip strength	-0.0987462	0.0693366	-0.0458989	0.417259	0.0195353	0.737351	0.011214	0.837794	0.0379564	0.499217	-0.0279081	0.61434
	Cardiometabolic disease (no/yes)	0.0430212	0.280399	0.0455071	0.259105	0.0444886	0.269132	0.0128487	0.742118	0.104232	0.00906755	0.0970601	0.0137429
	Respiratory disease (no/yes)	-0.0475788	0.193111	-0.0424264	0.279812	-0.00934697	0.811558	0.0125069	0.742135	0.0224061	0.565434	-0.027774	0.469853
	Musculoskeletal disease (no/yes)	-0.0219447	0.557801	0.015022	0.701974	0.0758342	0.0526768	0.0481768	0.204568	0.102647	0.00826551	0.0873804	0.0226818
	Digestive disease (no/yes)	0.0111953	0.758634	0.0148341	0.704925	0.0508128	0.1936	0.0805955	0.0332298	-0.0374451	0.335422	0.0490084	0.200879
	Neurological disease (no/yes)	-0.0825927	0.0227526	0.00347376	0.929133	0.0215799	0.579946	-0.0346185	0.359667	-0.00728998	0.850861	-0.0426966	0.263801
	Endocrine disease (no/yes)	0.0130404	0.722893	-0.0277602	0.478778	0.0181898	0.64189	0.0877758	0.0202447	0.0566644	0.144546	0.0598794	0.118183
	Cancer (no/yes)	-0.0163511	0.652802	0.0861888	0.0268699	0.0341998	0.379753	0.0480487	0.202929	0.0510647	0.187013	0.081655	0.0321642
	Metabolic syndrome (# components)	0.112301	0.00507749	0.0619271	0.123271	0.156931	7.74427e-05	0.136443	0.000446952	0.23125	3.06984e-09	0.276944	9.09584e-13
	# Chronic diseases	-0.0586898	0.130065	0.0606644	0.126469	0.0679034	0.0866332	0.0477629	0.213974	0.0339454	0.389296	0.0593819	0.126405
Mental Health	Current MDD (no/yes)	0.0431424	0.242765	0.0987809	0.0126	0.090971	0.0214261	0.0456891	0.234038	-0.0177223	0.652808	0.10632	0.0060487
	Depression severity	0.0597145	0.116267	0.135055	0.000843422	0.105241	0.00995888	0.0307658	0.443034	-0.00214453	0.957786	0.133227	0.000760792
	Childhood Trauma	-0.0582699	0.116741	0.15764	6.1235e-05	0.0513078	0.193929	0.0455774	0.232309	0.0319388	0.415457	0.0902743	0.0195515
* Beta for telomere length was multiplied by -1 to compare with other biological clocks
Bold indicates FDR<5%
