# Supplementary material for: An integrative study of five biological clocks in somatic and mental health
Source: eLife. 2021 Feb 9;10:e59479. doi: 10.7554/eLife.59479 (PMC7872513; doi:10.7554/eLife.59479)
Supplement: Supplementary file 3. [file elife-59479-supp3.xls]

## Sheet: D
	Telomere Length	N=2936		Epigenetic Aging	N=1130		Transcriptomic Aging	N= 1990		Proteomic Aging	N=1837		Metabolomic Aging	N=2910
	Beta*	P	# cases	Beta	P	# cases	Beta	P	# cases	Beta	P	# cases	Beta	P	# cases
Mortality (no/yes)	0.124279	0.292073	64	0.115958	0.536346	29	0.00547208	0.971519	42	0.337183	0.0687627	27	-0.0313942	0.803588	63
Metabolic syndrome onset (no/yes)	-0.101147	0.424185	55	0.0853134	0.691066	22	-0.0488452	0.764881	37	0.107705	0.460518	44	0.236942	0.0790161	55
Cardiometabolic disease onset (no/yes)	0.0196047	0.795582	164	-0.127368	0.298095	71	0.0777244	0.405631	118	0.200482	0.0269522	119	0.216657	0.00638073	165
Respiratory disease onset (no/yes)	0.0451396	0.664077	82	-0.200247	0.242235	35	0.185966	0.182973	51	0.217308	0.0855116	59	-0.122374	0.26705	83
Musculoskeletal disease onset (no/yes)	-0.00859602	0.918893	128	0.0139723	0.917224	58	-0.0072299	0.943495	98	0.0857486	0.402096	92	-0.0576604	0.516817	130
Digestive disease onset (no/yes)	0.0260571	0.802007	82	0.26672	0.13096	33	-0.133839	0.288282	63	-0.0325943	0.793466	61	-0.126153	0.261245	80
Endocrine disease onset (no/yes)	0.0537379	0.712609	41	0.0938393	0.700055	17	-0.19547	0.296067	28	0.0409785	0.818759	29	-0.367092	0.0198861	40
Cancer onset (no/yes)	-0.0856936	0.483564	59	-0.274034	0.24719	18	-0.0133202	0.930723	42	-0.0588717	0.682958	45	-0.0396557	0.756881	61
For all P: FDR>5%
